# Supplementary material for: Systematic, network-based characterization of therapeutic target inhibitors
Source: PLOS journal article supplement (doi:10.1371/journal.pcbi.1005599), 2017-10-12
Supplement: S1 (10.1371/journal.pcbi.1005599.s001) [file journal.pcbi.1005599.s001]

**S1 Table: OncoLead inferred CMAP - MCF7, PC3, and HL60 drug perturbational transcription regulator activity.** Available from:

<https://figshare.com/s/635c0ee06b8b3448d12d>
