# Supplementary material for: Systematic, network-based characterization of therapeutic target inhibitors
Source: PLoS Comput Biol. 2017 Oct 12;13(10):e1005599. doi: 10.1371/journal.pcbi.1005599 (PMC5638208; doi:10.1371/journal.pcbi.1005599)
Supplement: S4 Table — (XLSX) [file pcbi.1005599.s004.xlsx]

## Sheet: Sheet1
DRUG	Conc.1 (uM)	Conc.2 (uM)	Conc.3 (uM)	Conc.4 (uM)	Suppressing MYC activity
tanespimycin	0.4	0.2	0.1	0.025	++
allantoin	10	5	2.5	0.625	++
amoxapine	10	5	2.5	0.625	++
clemastine	10	5	2.5	0.625	++
dilazep	10	5	2.5	0.625	++
fulvestrant	5	2.5	1.25	0.3125	++
nortriptyline	10	5	2.5	0.625	-
rifabutin	10	5	2.5	0.625	-
trichostatin.A	0.02	0.01	0.005	0.00125	-
trifluridine	10	5	2.5	0.625	++
